# Supplementary material for: Structure, Composition and Metagenomic Profile of Soil Microbiomes Associated to Agricultural Land Use and Tillage Systems in Argentine Pampas
Source: PubMed Central journal article supplement (PMC4055693; doi:10.1371/journal.pone.0099949), 2014-06-12

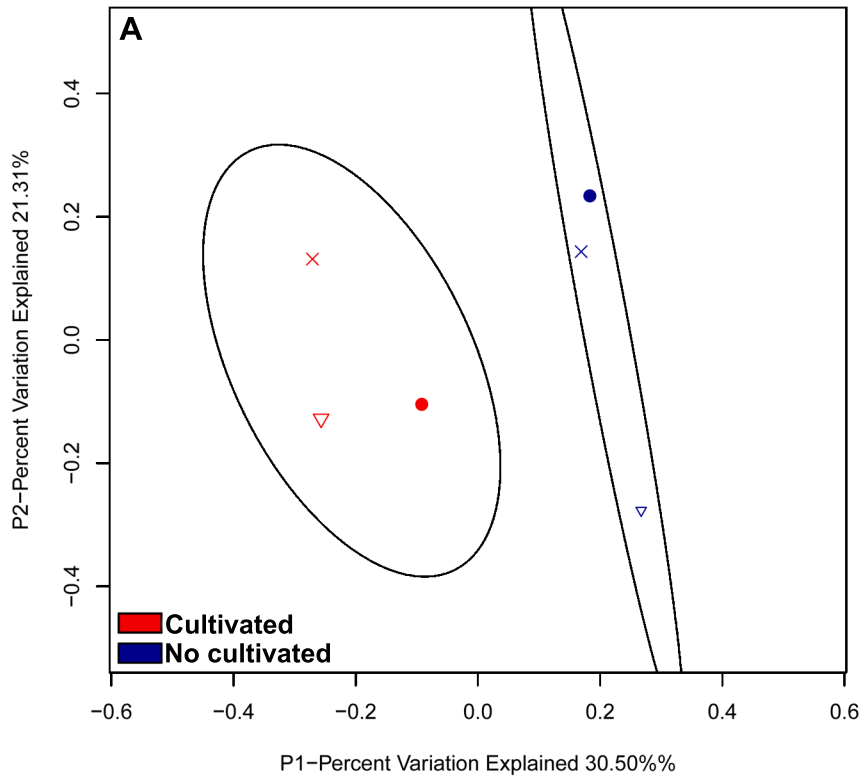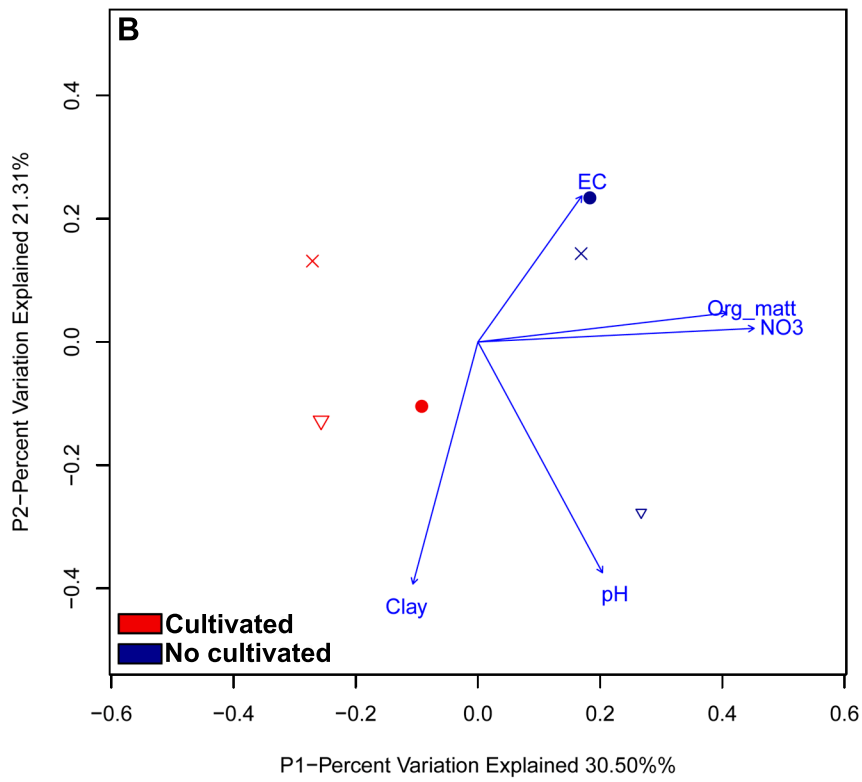

Supplement: pone.0099949.s001.pdf [file pone.0099949.s001.pdf]
