# Supplementary material for: Structure, Composition and Metagenomic Profile of Soil Microbiomes Associated to Agricultural Land Use and Tillage Systems in Argentine Pampas
Source: PLOS journal article supplement (doi:10.1371/journal.pone.0099949), 2014-06-12
Supplement: S3 (10.1371/journal.pone.0099949.s003) [file journal.pone.0099949.s003]

P2-Percent Variation Explained 26.16

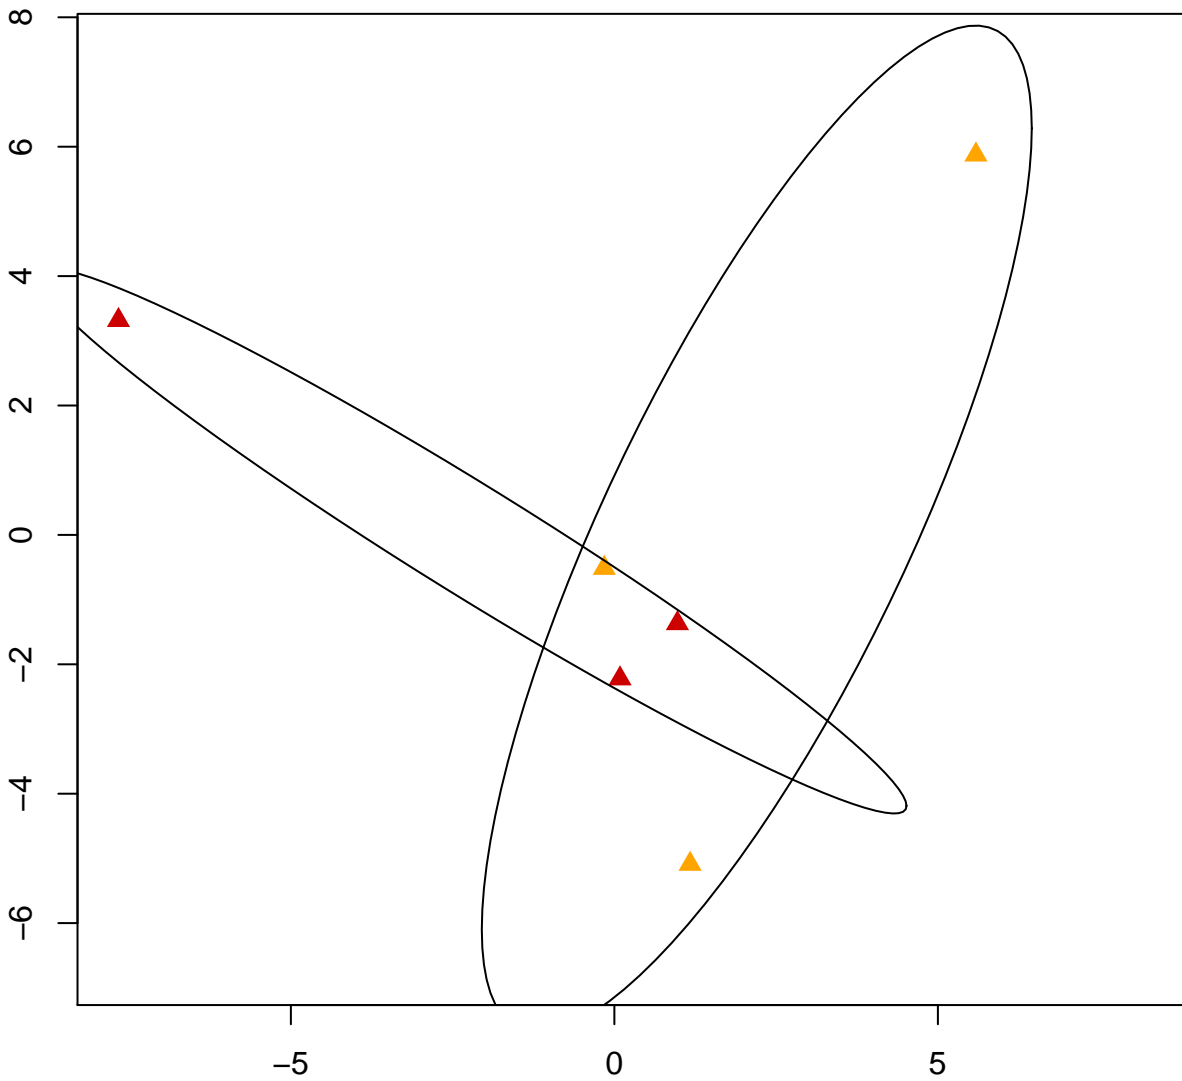

P1-Percent Variation Explained 30.77
